# Supplementary material for: Coagulation Behavior of Antimony Oxyanions in Water: Influence of pH, Inorganic and Organic Matter on the Physicochemical Characteristics of Iron Precipitates
Source: MDPI journal article supplement (doi:10.3390/molecules27051663), 2022-03-03
Supplement: s1 [file s1]

*Supplementary Materials*

# Coagulation Behavior of Antimony Oxyanions in Water: Influence of pH, Inorganic and Organic Matter on the Physicochemical Characteristics of Iron Precipitates

Muhammad Ali Inam <sup>1</sup>, Kang Hoon Lee <sup>2,\*</sup>, Hira Lal Soni <sup>3</sup>, Kashif Hussain Mangi <sup>3</sup>, Abdul Sami Channa <sup>3</sup>, Rizwan Khan <sup>3</sup>, Young Min Wie <sup>4</sup> and Ki Gang Lee <sup>4</sup>

<sup>1</sup> Institute of Environmental Sciences and Engineering (IESE), School of Civil and Environmental Engineering (SCEE), National University of Sciences and Technology (NUST), H-12 Campus, Islamabad 44000, Pakistan; ainam@iese.nust.edu.pk

<sup>2</sup> Department of Energy and Environmental Engineering, The Catholic University of Korea, 43 Jibong-ro, Bucheon-si, Gyeonggi-do 14662, Korea

<sup>3</sup> Department of Chemical Engineering, Quaid-e-Awam University of Engineering, Science and Technology (QUEST), Nawabshah 67480, Sindh, Pakistan; soni.hiralal@quest.edu.pk (H.L.S.), kashifmangi@quest.edu.pk (K.H.M.); abdulsami@quest.edu.pk (A.S.C.); rizwansoomro@quest.edu.pk (R.K.)

<sup>4</sup> Department of Materials Engineering, Kyonggi University, Suwon 16227, Korea; supreme98@kyonggi.ac.kr (Y.M.W.), gglee@kyonggi.ac.kr (K.G.L.)

\* Correspondence: diasyoung@catholic.ac.kr

**Citation:** Inam, M.A.; Lee, K.H.; Soni, H.L.; Mangi, K.H.; Channa, A.S.; Khan, R.; Wie, Y.M.; Lee, K.G. Coagulation Behavior of Antimony Oxyanions in Water: Influence of pH, Inorganic and Organic Matter on the Physicochemical Characteristics of Iron Precipitates. *Molecules* **2022**, *27*, 1663. <https://doi.org/10.3390/molecules27051663>

Academic Editors: Monika Wawrzekiewicz; Anna Wołowicz

Received: 11 January 2022

Accepted: 1 March 2022

Published: 3 March 2022

**Publisher's Note:** MDPI stays neutral with regard to jurisdictional claims in published maps and institutional affiliations.

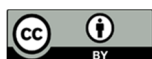

**Copyright:** © 2022 by the authors. Submitted for possible open access publication under the terms and conditions of the Creative Commons Attribution (CC BY) license (<https://creativecommons.org/licenses/by/4.0/>).

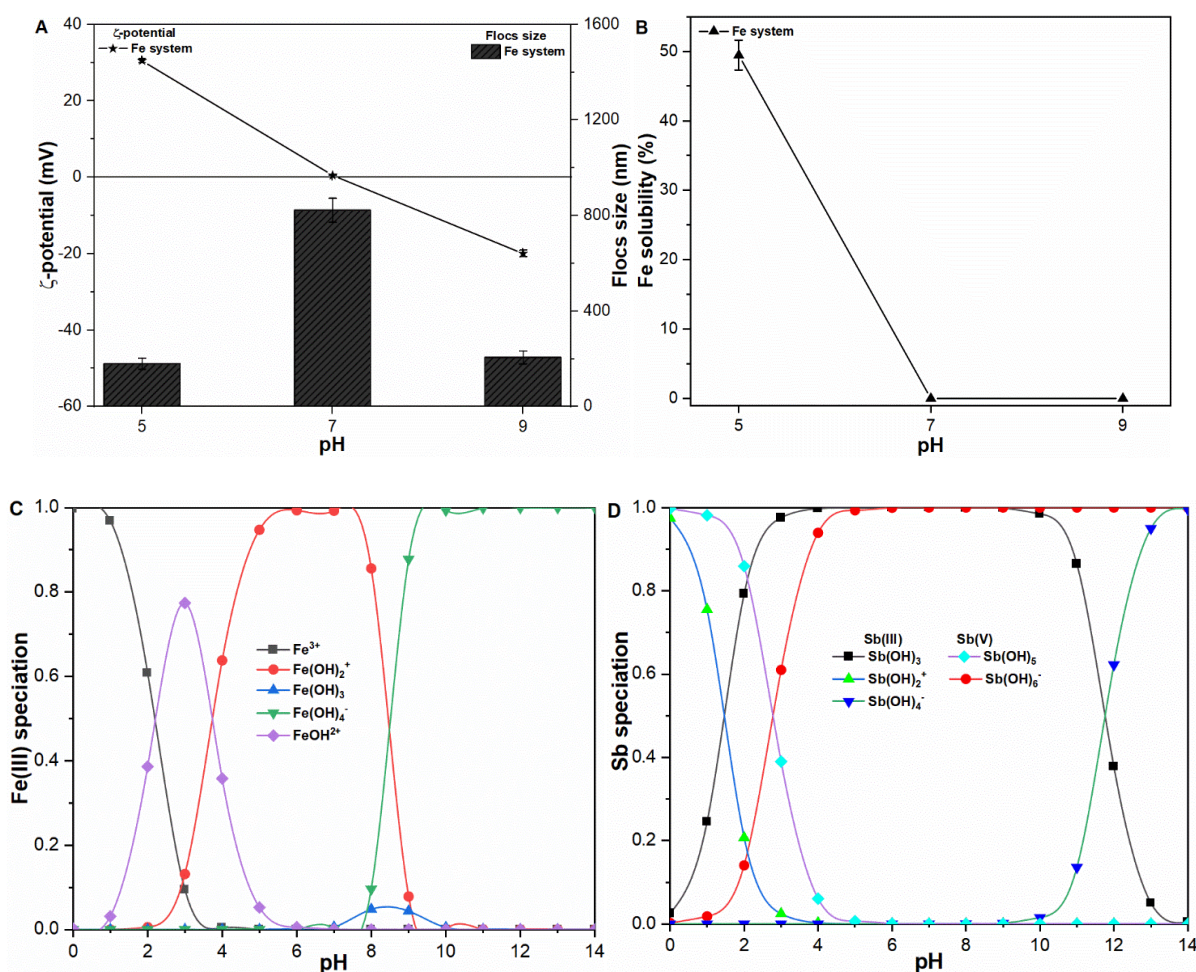

**Figure S1:** (A) Influence of pH on zeta potential (mV) and size (nm) of freshly formed Fe flocs; (B) Fe solubility (%) in pure water and; (C,D) Speciation diagrams of Fe(III) and Sb(III, V) drawn using Visual MINTEQ 3.1.

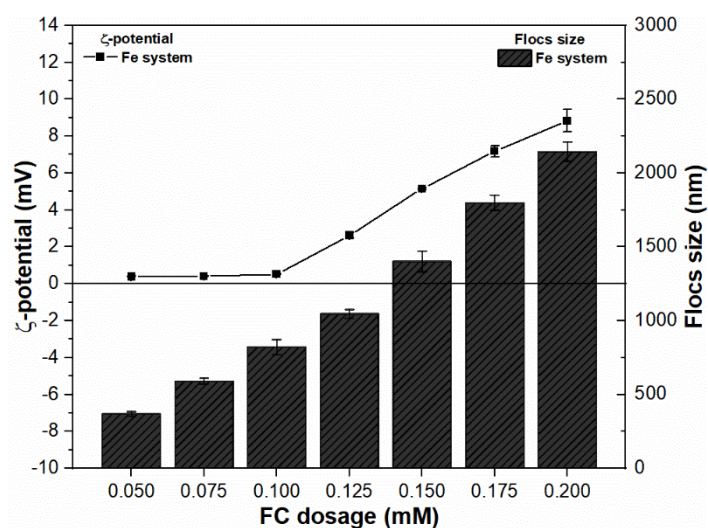

**Figure S2:** Influence of FC dosages on zeta potential (mV) and size (nm) of freshly formed Fe flocs in pure water.



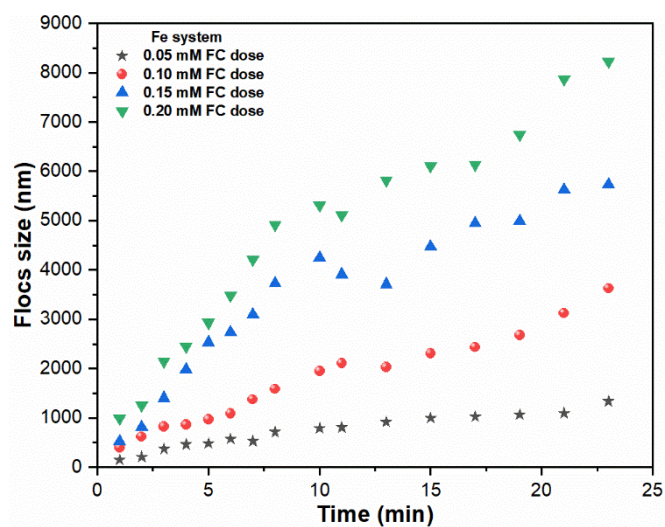

Figure S3: Aggregation of Fe precipitates in pure water as a function of time under various applied FC dosages.

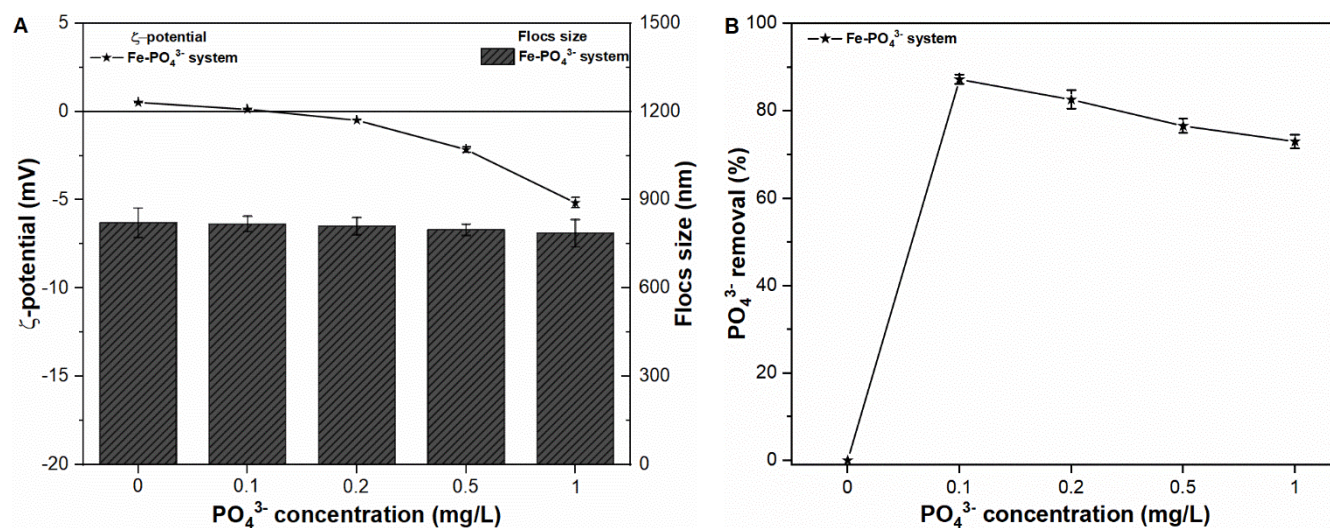

Figure S4: Influence of  $\text{PO}_4^{3-}$  concentration on (A) zeta potential (mV) and size (nm) of freshly formed Fe flocs and; (B)  $\text{PO}_4^{3-}$  removal (%) in pure water.

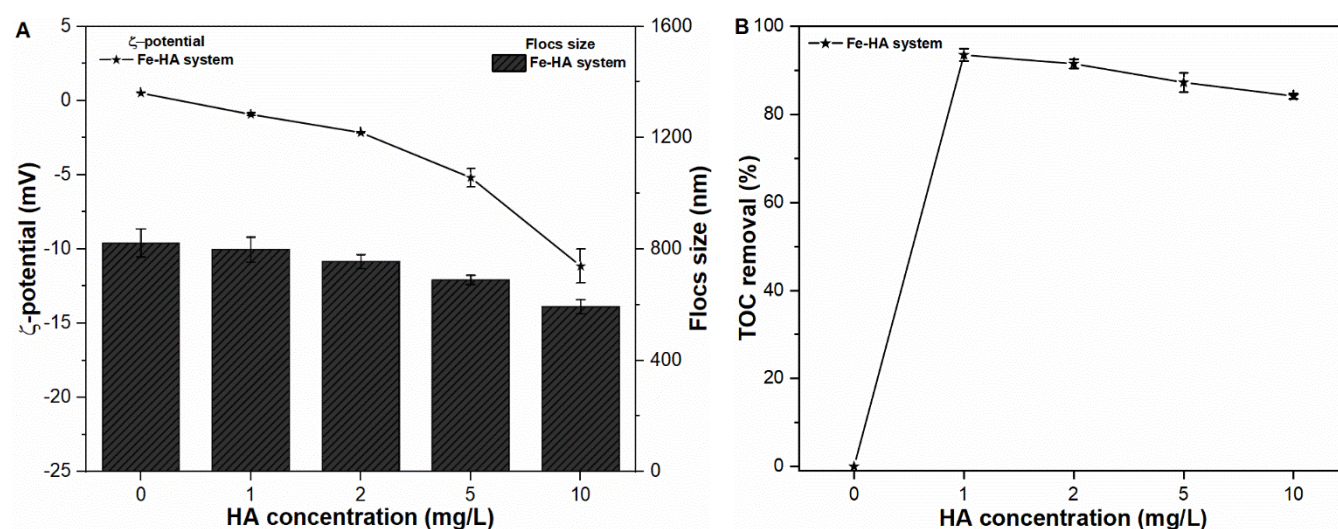

Figure S5: Influence of HA concentration on (A) zeta potential (mV) and size (nm) of freshly formed Fe flocs and; (B) TOC removal (%) in pure water.

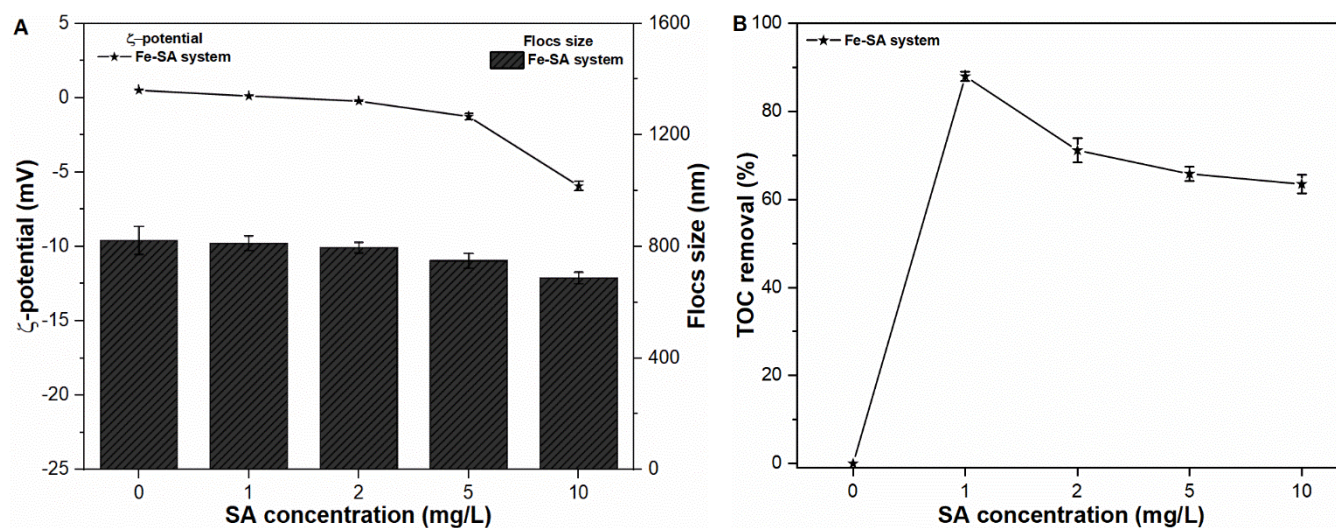

**Figure S6:** Influence of SA concentration on (A) zeta potential (mV) and size (nm) of freshly formed Fe flocs and; (B) TOC removal (%) in pure water.
